# Supplementary material
Source: PubMed Central journal article supplement (PMC4152884)
Supplement: supp_113.212662_JPET_212662_suppl_data.pdf [file supp_113.212662_JPET_212662_suppl_data.pdf]

**NS19504: a novel BK channel activator with relaxing effect on  
bladder smooth muscle spontaneous phasic contractions**

Bernhard Nausch, Frederik Rode, Susanne Jørgensen, Antonio Nardi, Mads P. G. Korsgaard, Charlotte Hougaard, Adrian D. Bonev, William D. Brown, Tino Dyhring, Dorte Strøbæk, Søren-Peter Olesen, Palle Christophersen, Morten Grunnet, Mark T.

Nelson, Lars C. B. Rønn

*NeuroSearch A/S, Pederstrupvej 93, DK-2750 Ballerup, Denmark (FR, SJ, AN, MPGK, CH, WDB, TD, DS, SPO, PC, MG, LCBR), University of Vermont, Department of Pharmacology, Burlington, VT 05405, USA (BN, ADB, MTN)*

## Supplemental Materials and Methods

### Selectivity testing

#### *DRG neurons (Na<sub>v</sub> and Ca<sub>v</sub> channels):*

DRG neurons were isolated from adult male Sprague Dawley rats by standard procedures and incubated for 1-2 days in Hank Buffered Salt Solution (HBSS) before recordings of voltage-dependent Na<sup>+</sup> and Ca<sup>2+</sup>-currents were performed. Na<sub>v</sub> currents were recorded using a bath saline containing in mM: 40 NaCl, 4 KCl, 110 TEA-Cl, 2 CaCl<sub>2</sub>, 1 MgCl<sub>2</sub> and 10 HEPES (pH 7.4 with NaOH). Ca<sub>v</sub> currents were recorded using a bath saline containing in mM: 144 TEA-Cl, 10 BaCl<sub>2</sub>, 1 MgCl<sub>2</sub> and 10 HEPES (pH 7.4 with CsOH). The pipette saline contained in mM: 140 L-aspartic acid, 10 CsCl, 4 NaCl, 2.7 MgCl<sub>2</sub>, 0.041 CaCl<sub>2</sub>, 0.1 EGTA and 10 HEPES (pH 7.2 with CsOH). Both Na<sub>v</sub> and Ca<sub>v</sub> currents were recorded in the whole cell voltage clamp mode by 15 ms steps to 0 mV elicited every 5 s. The voltage-dependent Na<sub>v</sub> and Ca<sub>v</sub> currents were not further characterized i.e. no differentiation of TTX-sensitive and -insensitive currents and no pharmacological isolation in T-, P/Q-, L-, and N Ca<sub>v</sub> currents.

#### *HEK293 cells (hIK, hSK3, hSK2, Na<sub>v</sub>1.2):*

Cultured HEK293 cell lines stably expressing the ion channels in question were cultured and maintained as the stable hBK channel cell line. hIK, hSK3, hSK2 currents were recorded using the same experimental salines as for hBK and applying the same voltage ramp protocol. Na<sub>v</sub>1.2 were recorded using the same extracellular saline as for hBK and an intracellular saline containing in mM: 146 KCl, 5.17 CaCl<sub>2</sub>, 1.42 MgCl<sub>2</sub>, 10 EGTA, 10 HEPES and 4 ATP (pH 7.2 with KOH).

## Supplemental figure S1

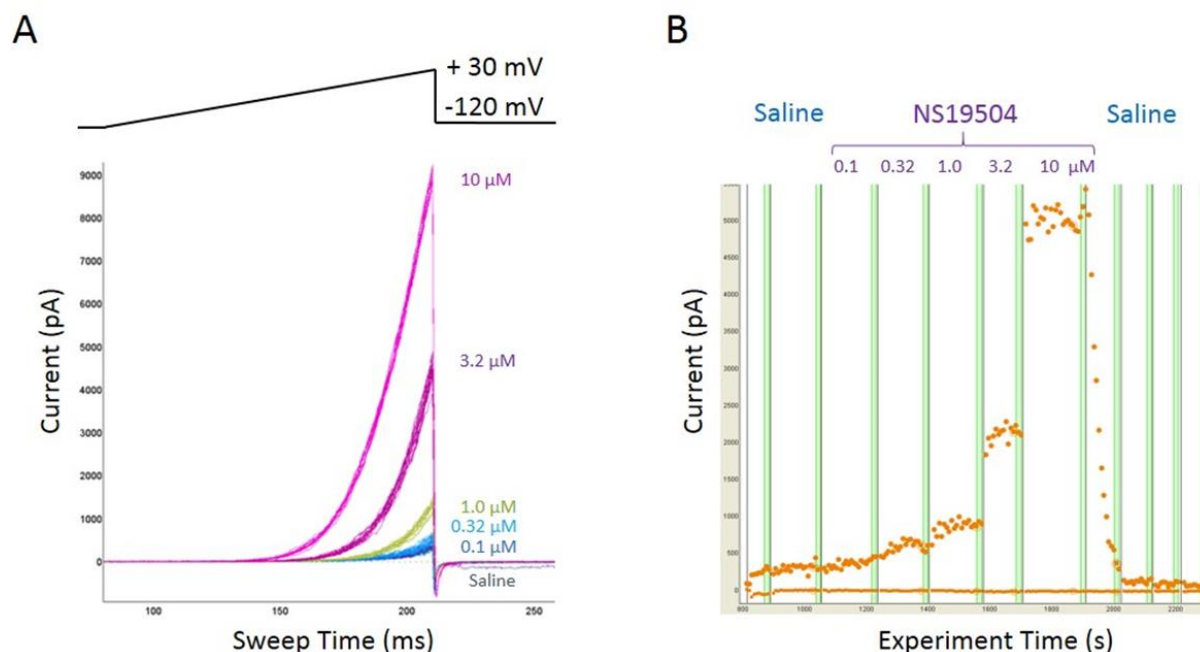

Hit validation performed by automated electrophysiology using a 48-channel QPatchHTX screening station. The BK expressing HEK293 cell line were the same as used in the FLIPR HTS screen (Fig. 1, 2, and 3 in main text). The extracellular and intracellular buffers used on the QPatch were the same as used for the manual electrophysiology experiments, except that 24 mM KCl was substituted with 24 mM KF in the intracellular saline in order to improve giga-seal formation. A representative QPatchHTX concentration-response experiment with NS19504 is shown. BK currents were elicited by repeatedly applying voltage ramps from -120 mV to +30 mV in 150 ms every 10 s. After giga-seal formation and break-through to the whole cell configuration, extracellular buffer was added to record the current response during the saline period. This was followed by recording of the current responses to five cumulative additions of NS19504 spanning from 0.1 to 10  $\mu$ M and finally a complete wash-out of the compound was obtained during addition of extracellular buffer. Fig 1A shows the overlay of the current traces during the saline period as well as during each of the five concentrations of NS19504. Fig. 1B shows the time course of the entire experiment measured at two different voltages (-100 mV and +28 mV) including 4 periods with addition of extracellular buffer at the end of the experiment, which completely reversed the current to control levels. The black vertical lines indicate the timing of liquid addition to the QPlate and the green vertical lines show the data points used in calculations of the compound effects.

**Supplemental figure S2**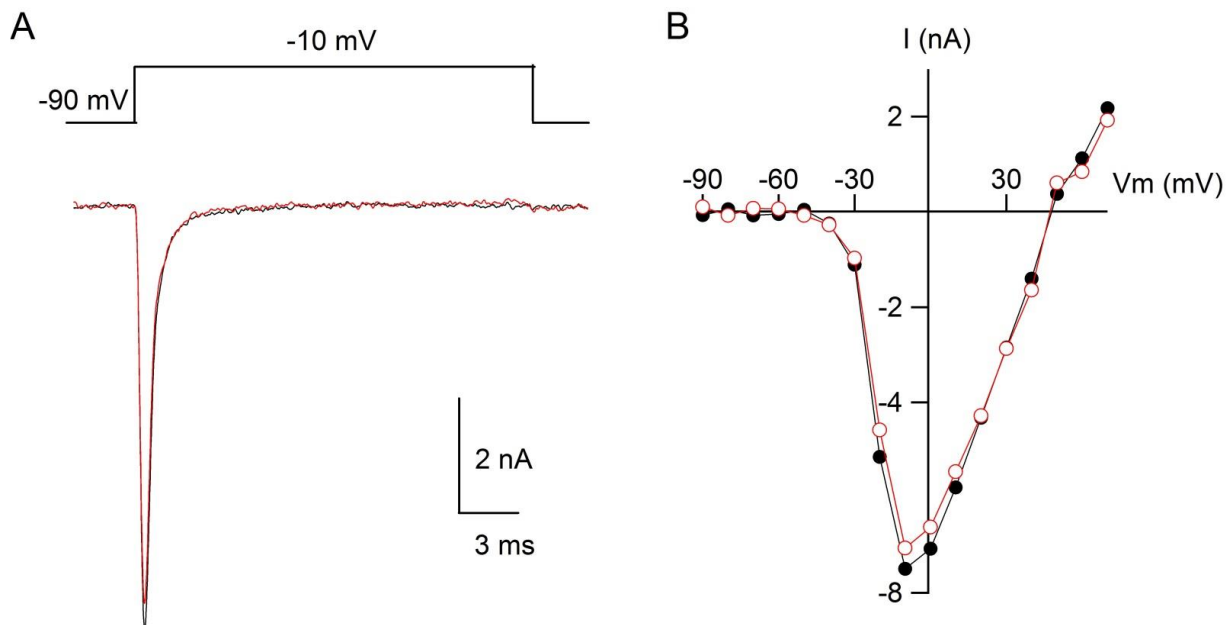**Test for effects on rNav1.2 channels in whole-cell experiments**

Whole-cell patch clamp experiments were performed using similar salines as for experiments with hBK but the pipette saline contained 4 mM ATP and a free concentration  $\text{Ca}^{2+}$  of 0.1  $\mu\text{M}$ . Voltage steps of 20 ms duration to potentials between -90 mV and +70 mV (10 mV increments) were applied every 2 seconds from a holding potential of -90 mV. A) Current traces recorded upon a step to -10 mV before (black) and in the presence (red) of 10  $\mu\text{M}$  NS19504. B) IV curves measured from the peak currents before (filled black circles) and in the presence of 10  $\mu\text{M}$  NS19504 (open red circles). Traces were leak subtracted off line using a P/5 protocol (step fraction = 0.1; leak holding = -100 mV)

**Supplemental Table S1**

*In vitro* receptor binding selectivity of NS19504. Significant results defined as  $\geq 50\%$  inhibition or stimulation. NS19504 was tested at a concentration of 10  $\mu\text{M}$ .

| Target                                              | Species | Radioligand                                        | % Inhibition at 10 $\mu\text{M}$ |
|-----------------------------------------------------|---------|----------------------------------------------------|----------------------------------|
| Adenosine A <sub>1</sub>                            | Human   | [ <sup>3</sup> H]DPCPX                             | 3                                |
| Adenosine A <sub>2A</sub>                           | Human   | [ <sup>3</sup> H]CGS-21680                         | 8                                |
| Adenosine A <sub>3</sub>                            | Human   | [ <sup>125</sup> I]AB-MECA                         | 13                               |
| Adrenergic $\alpha_{1A}$                            | Rat     | [ <sup>3</sup> H]Prazosin                          | 1                                |
| Adrenergic $\alpha_{1B}$                            | Rat     | [ <sup>3</sup> H]Prazosin                          | 17                               |
| Adrenergic $\alpha_{1D}$                            | Human   | [ <sup>3</sup> H]Prazosin                          | 11                               |
| Adrenergic $\alpha_{2A}$                            | Human   | [ <sup>3</sup> H]MK-912                            | 8                                |
| Adrenergic $\beta_1$                                | Human   | [ <sup>125</sup> I]Cyanopindolol                   | 9                                |
| Adrenergic $\beta_2$                                | Human   | [ <sup>3</sup> H]CGP-12177                         | 6                                |
| Androgen (Testosterone) AR                          | Rat     | [ <sup>3</sup> H]Mibolerone                        | 7                                |
| Bradykinin B <sub>1</sub>                           | Human   | [ <sup>3</sup> H](Des-Arg <sup>10</sup> )-Kallidin | 15                               |
| Bradykinin B <sub>2</sub>                           | Human   | [ <sup>3</sup> H]Bradykinin                        | -13                              |
| Ca <sup>2+</sup> Chan. (L-type),<br>Benzothiazepine | Rat     | [ <sup>3</sup> H]Diltiazem                         | 15                               |
| Ca <sup>2+</sup> Chan. (L-type),<br>Dihydropyridine | Rat     | [ <sup>3</sup> H]Nitrendipine                      | 12                               |
| Ca <sup>2+</sup> Chan. (N-type)                     | Rat     | [ <sup>125</sup> I] $\omega$ -Conotoxin GVIA       | 8                                |
| Dopamine D <sub>1</sub>                             | Human   | [ <sup>3</sup> H]SCH-23390                         | 9                                |
| Dopamine D <sub>2S</sub>                            | Human   | [ <sup>3</sup> H]Spiperone                         | 10                               |
| Dopamine D <sub>3</sub>                             | Human   | [ <sup>3</sup> H]Spiperone                         | 11                               |
| Dopamine D <sub>4,2</sub>                           | Human   | [ <sup>3</sup> H]Spiperone                         | 8                                |
| Endothelin ET <sub>A</sub>                          | Human   | [ <sup>125</sup> I]Endothelin-1                    | -1                               |
| Endothelin ET <sub>B</sub>                          | Human   | [ <sup>125</sup> I]Endothelin-1                    | 0                                |

|                                                      |       |                                                  |     |
|------------------------------------------------------|-------|--------------------------------------------------|-----|
| Epidermal Growth Factor (EGF)                        | Human | [ <sup>125</sup> I]EGF (human)                   | 3   |
| Estrogen ER $\alpha$                                 | Human | [ <sup>3</sup> H]Estradiol                       | 4   |
| G Protein-Coupled Receptor<br>GPR103                 | Human | [ <sup>125</sup> I]QRFP-43                       | 0   |
| GABA <sub>A</sub> , Agonist Site                     | Rat   | [ <sup>3</sup> H]Muscimol                        | 11  |
| GABA <sub>A</sub> , Benzodiazepine,<br>Flunitrazepam | Rat   | [ <sup>3</sup> H]Flunitrazepam                   | 3   |
| GABA <sub>B1A</sub>                                  | Human | [ <sup>3</sup> H]CGP-54626                       | 15  |
| Glucocorticoid                                       | Human | [ <sup>3</sup> H]Dexamethasone                   | 3   |
| Glutamate, Kainate                                   | Rat   | [ <sup>3</sup> H]Kainic Acid                     | 4   |
| Glutamate, NMDA, Agonism                             | Rat   | [ <sup>3</sup> H]CGP-39653                       | 20  |
| Glutamate, NMDA, Glycine                             | Rat   | [ <sup>3</sup> H]MDL-105519                      | -2  |
| Glutamate, NMDA, Phencyclidine                       | Rat   | [ <sup>3</sup> H]TCP                             | -12 |
| Histamine H <sub>1</sub>                             | Human | [ <sup>3</sup> H]Pyrilamine                      | 16  |
| Histamine H <sub>2</sub>                             | Human | [ <sup>125</sup> I]Aminopotentidine              | 16  |
| Histamine H <sub>3</sub>                             | Human | [ <sup>3</sup> H]R(-)- $\alpha$ -Methylhistamine | -17 |
| Imidazoline I <sub>2</sub> , Central                 | Rat   | [ <sup>3</sup> H] Idazoxan                       | -4  |
| Interleukin IL-1                                     | Mouse | [ <sup>125</sup> I]IL-1 $\beta$                  | -2  |
| Leukotriene, Cysteinyl CysLT <sub>1</sub>            | Human | [ <sup>3</sup> H]LTD <sub>4</sub>                | -5  |
| Melatonin MT <sub>1</sub>                            | Human | [ <sup>125</sup> I]2-Iodomelatonin               | 20  |
| Muscarinic M <sub>1</sub>                            | Human | [ <sup>3</sup> H]N-Methylscopolamine             | 6   |
| Muscarinic M <sub>2</sub>                            | Human | [ <sup>3</sup> H]N-Methylscopolamine             | -4  |
| Muscarinic M <sub>3</sub>                            | Human | [ <sup>3</sup> H]N-Methylscopolamine             | 6   |
| Neuropeptide Y Y <sub>1</sub>                        | Human | [ <sup>125</sup> H]Peptide YY                    | -7  |
| Neuropeptide Y Y <sub>2</sub>                        | Human | [ <sup>125</sup> H]Peptide YY                    | -14 |
| Nicotinic Acetylcholine                              | Human | [ <sup>125</sup> I]Epibatidine                   | 0   |
| Nicotinic Acetylcholine $\alpha_1$ ,<br>Bungarotoxin | Human | [ <sup>125</sup> I] $\alpha$ -Bungarotoxin       | 1   |
| Opiate $\delta$ (OP1, DOP)                           | Human | [ <sup>3</sup> H]Naltrindole                     | 9   |

|                                          |         |                                                                      |           |
|------------------------------------------|---------|----------------------------------------------------------------------|-----------|
| Opiate $\kappa$ (OP2, KOP)               | Human   | [ <sup>3</sup> H]Diprenorphine                                       | 16        |
| Opiate $\mu$ (OP3, MOP)                  | Human   | [ <sup>3</sup> H]Diprenorphine                                       | -11       |
| Phorbol Ester                            | Mouse   | [ <sup>3</sup> H]PDBu                                                | 6         |
| Platelet Activating Factor (PAF)         | Human   | [ <sup>3</sup> H]PAF                                                 | 10        |
| Potassium Channel [K <sub>ATP</sub> ]    | Hamster | [ <sup>3</sup> H]Glyburide                                           | 1         |
| Potassium Channel HERG                   | Human   | [ <sup>3</sup> H]Astemizole                                          | 19        |
| Prostanoid EP <sub>4</sub>               | Human   | [ <sup>3</sup> H]Prostaglandin E <sub>2</sub><br>(PGE <sub>2</sub> ) | 0         |
| Purinergic P <sub>2X</sub>               | Rabbit  | [ <sup>3</sup> H] $\alpha$ , $\beta$ -Methylene-ATP                  | 14        |
| Purinergic P <sub>2Y</sub>               | Rat     | [ <sup>35</sup> S]ATP- $\alpha$ S                                    | 4         |
| Rolipram                                 | Rat     | [ <sup>3</sup> H]Rolipram                                            | -16       |
| Serotonin 5-HT <sub>1A</sub>             | Human   | [ <sup>3</sup> H]8-OH-DPAT                                           | 5         |
| Serotonin 5-HT <sub>3</sub>              | Human   | [ <sup>3</sup> H]GR-65630                                            | 9         |
| <b>Sigma <math>\sigma_1</math></b>       | Human   | [ <sup>3</sup> H]Haloperidol                                         | <b>59</b> |
| Sigma $\sigma_2$                         | Rat     | [ <sup>3</sup> H]Ifenprodil                                          | 18        |
| Sodium Channel, Site 2                   | Rat     | [ <sup>3</sup> H]Batrachotoxin                                       | 32        |
| Tachykinin NK <sub>1</sub>               | Human   | [ <sup>3</sup> H]SR-140333                                           | 0         |
| Thyroid Hormone                          | Rat     | [ <sup>125</sup> I]Triiodothyronine                                  | 10        |
| <b>Transporter, Dopamine (DAT)</b>       | Human   | [ <sup>125</sup> I]RTI-55                                            | <b>75</b> |
| Transporter, GABA                        | Rat     | [ <sup>3</sup> H]GABA                                                | -5        |
| <b>Transporter, Norepinephrine (NET)</b> | Human   | [ <sup>125</sup> I]RTI-55                                            | <b>74</b> |
| Transporter, Serotonin (SERT)            | Human   | [ <sup>3</sup> H]Paroxetine                                          | 6         |

---
